# Supplementary material for: Flip-flop dynamics in smectic liquid-crystal organic semiconductors revealed by molecular dynamics simulations
Source: Royal Society of Chemistry journal article supplement (doi:10.1039/d3cc05222b), 2024-01-01
Supplement: d3cc05222b1.pdf [file d3cc05222b1.pdf]

## Supporting Information

### Flip-flop dynamics in smectic liquid-crystal organic semiconductors revealed by molecular dynamics simulations

Tomoka Suzuki,<sup>a</sup> Antonio De Nicola,<sup>b</sup> Satoru Inoue,<sup>c</sup> Tomoharu Okada,<sup>a</sup> Tatsuo Hasegawa,<sup>c</sup> Giuseppe Milano,<sup>\*d</sup> and Hiroyuki Matsui<sup>\*a</sup>

<sup>a</sup> Research Center for Organic Electronics, Yamagata University, Yonezawa, Japan

<sup>b</sup> Scuola Superiore Meridionale, Naples, Italy

<sup>c</sup> Department of Applied Physics, The University of Tokyo, Tokyo, Japan

<sup>d</sup> Department of Chemical, Materials and Industrial Production Engineering, University of Naples Federico II, Naples, Italy

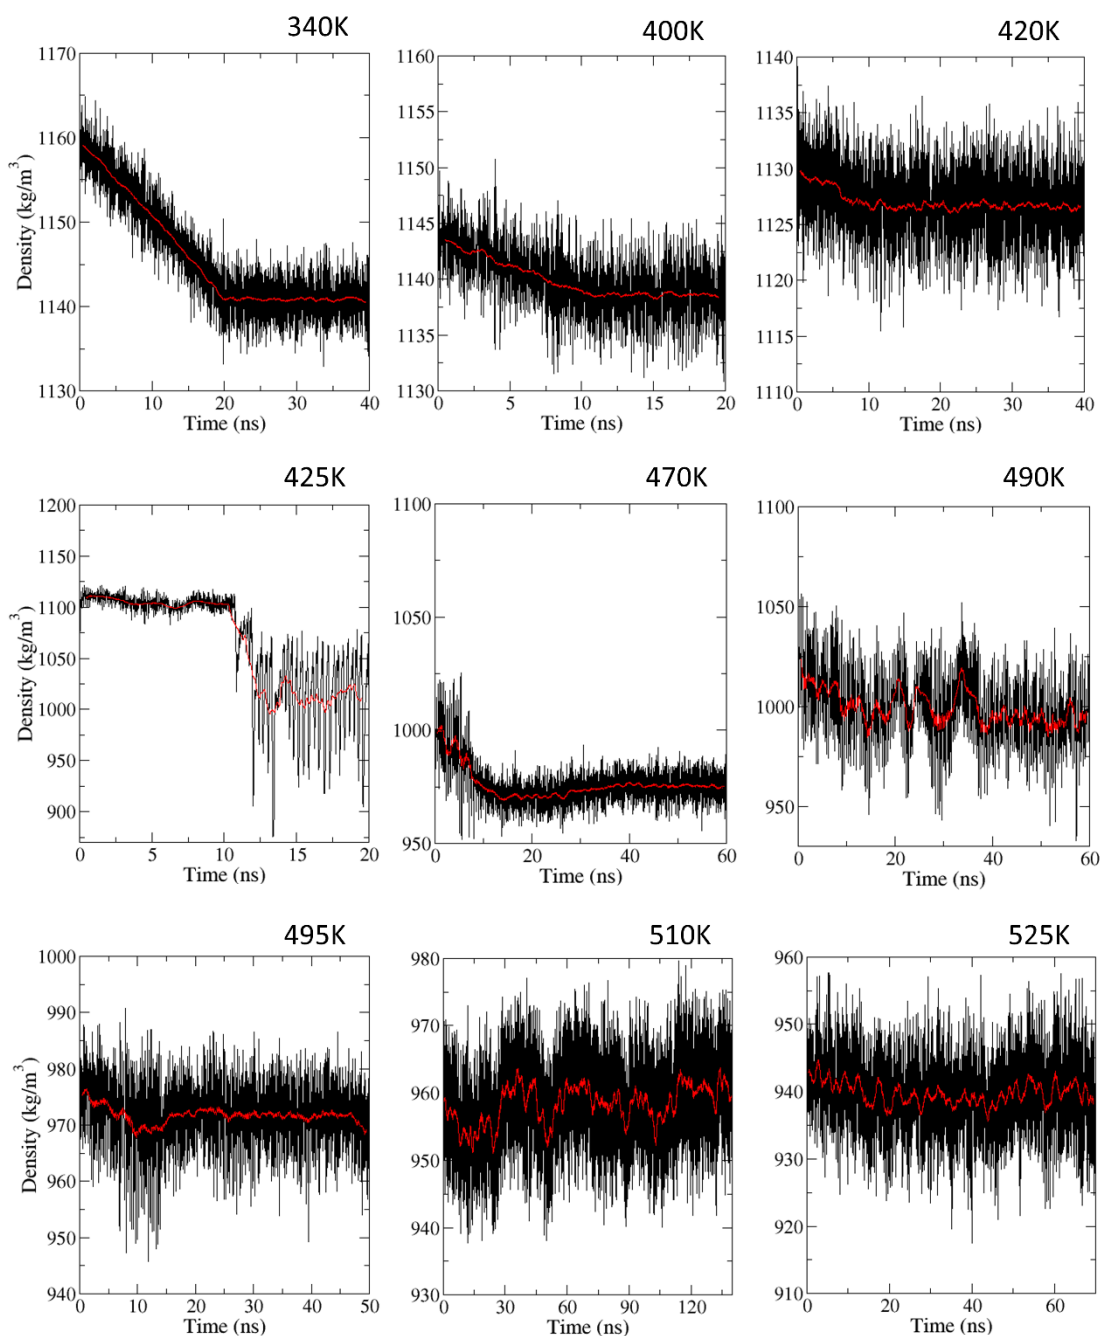

**Figure S1.** Time dependence of mass density during production runs at different temperatures. Red curves are moving average.

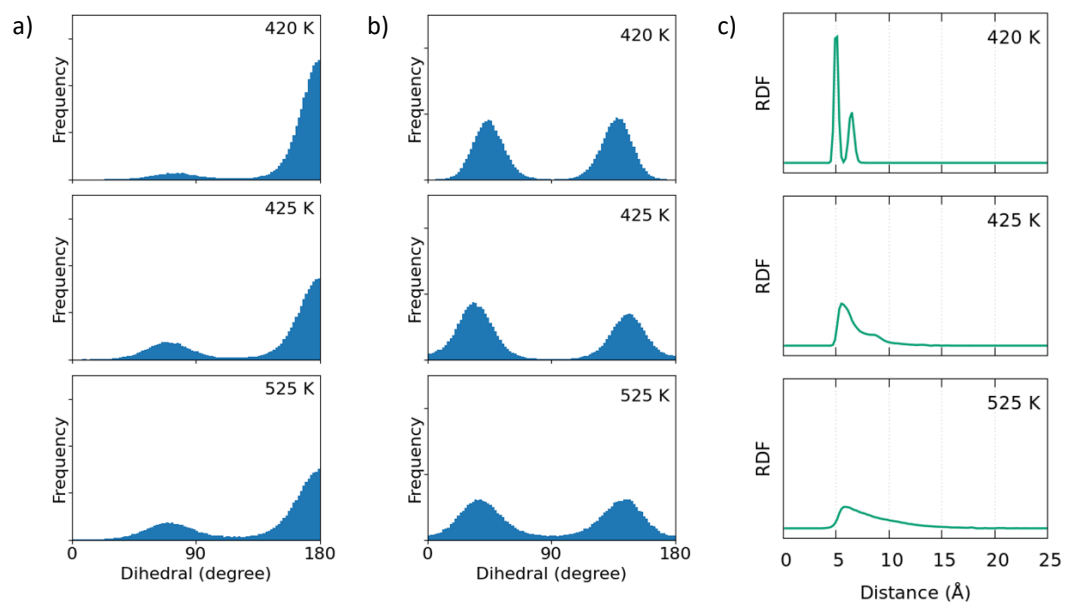

**Figure S2.** Histograms for dihedral angles of (a) alkyl chain and (b) tolyl group. (c) Radial distribution function for center of mass for BTBT core.
